# Supplementary material for: HISDAC-ES: historical settlement data compilation for Spain (1900–2020)
Source: Copernicus journal article supplement (doi:10.5194/essd-15-4713-2023), 2023-10-26
Supplement: Supplementary file 1 [file essd-15-4713-2023-supplement.zip]

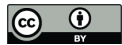

## *Supplement of*

# **HISDAC-ES: historical settlement data compilation for Spain (1900–2020)**

**Johannes H. Uhl et al.**

*Correspondence to:* Johannes H. Uhl ([johannes.uhl@colorado.edu](mailto:johannes.uhl@colorado.edu))

- [essd-15-4713-2023-supplement-title-page.pdf](#)
- [hisdac-es\\_animations](#)
  - [01\\_hisdac\\_es\\_developed\\_area\\_evolution.gif](#)
  - [02\\_hisdac\\_es\\_building\\_density\\_evolution.gif](#)
  - [03\\_hisdac\\_es\\_building\\_footprint\\_area\\_evolution.gif](#)
  - [04\\_hisdac\\_es\\_residential\\_landuse\\_evolution.gif](#)
  - [05\\_hisdac\\_es\\_commercial\\_landuse\\_evolution.gif](#)
  - [06\\_hisdac\\_es\\_industrial\\_landuse\\_evolution.gif](#)
  - [07\\_hisdac\\_es\\_municipality\\_bufa\\_density.gif](#)
  - [08\\_hisdac\\_es\\_municipality\\_building\\_density.gif](#)

The copyright of individual parts of the supplement might differ from the article licence.
